# Supplementary material for: Drug-Targeted Inhibition of Peroxisome Proliferator-Activated Receptorγ Enhances the Chemopreventive Effect of Anti-Estrogen
Source: PubMed Central journal article supplement (PMC3359890; doi:10.18632/oncotarget.457), 2012-04-13
Supplement: oncotarget-03-345-s001.pdf [file oncotarget-03-345-s001.pdf]

SUPPLEMENTARY DATA

Yuan et al. 2012. Drug-Targeted Inhibition of Peroxisome Proliferator-Activated Receptor-gamma Enhances the Chemopreventive Effect of Anti-Estrogen Therapy

**Table S1. Tumor histopathology.** Mice were fed standard rodent chow or chow supplemented with 0.1% GW9662 beginning one day after the last dose of DMBA. The number of tumors and the percentage of each histotype is indicated. There was a significant difference between GW9662-treated animals vs. fulvestrant ( $P=0.0333$ ), but not between GW9662-treated animals vs. control. ( $P=0.0867$ ). There was no significant difference between control vs. fulvestrant. Statistical analysis was by Fisher's Exact test. There was an insufficient number of tumor-bearing animals treated with GW9662 and fulvestrant for statistical analysis.

| Tumor Histology        | Control | GW9662  | Fulvestrant | GW9662+Fulv |
|------------------------|---------|---------|-------------|-------------|
| Adenocarcinoma         | 5 (50%) | 9 (90%) | 4 (40%)     | 1 (100%)    |
| Adenosquamous/Squamous | 1 (10%) | 1 (10%) | 2 (20%)     | 0           |
| Myoepithelial          | 4 (40%) | 0       | 4 (40%)     | 0           |

**Table S2. Gene expression in adenocarcinomas from control and GW9662-treated wild-type mice.**

Animals were maintained on a diet containing 0.1% GW9662 beginning one day after the last dose of DMBA as described in Fig. 1. Shown are genes whose raw values were  $\geq 300$  and changed  $\geq 2.5$ -fold in GW9662-treated animals vs. control mice.

| Gene symbol | Gene Title                                                                      | Fold Change | Raw Value |        |
|-------------|---------------------------------------------------------------------------------|-------------|-----------|--------|
|             |                                                                                 |             | Control   | GW9662 |
| Ces3        | carboxylesterase 3                                                              | -105.7      | 2733      | 25     |
| Tmem45b     | transmembrane protein 45b                                                       | -89.3       | 3775      | 42     |
| Gys2        | glycogen synthase 2                                                             | -74.7       | 558       | 7      |
| Lep         | leptin                                                                          | -74.7       | 1231      | 16     |
| Adrb3       | adrenergic receptor, beta 3                                                     | -69.3       | 644       | 9      |
| Csn1s2a     | casein alpha s2-like A                                                          | -69.0       | 8326      | 583    |
| Cidec       | cell death-inducing DFFA-like effector c                                        | -60.6       | 2171      | 36     |
| Aqp7        | aquaporin 7                                                                     | -55.6       | 3523      | 63     |
| Mrap        | melanocortin 2 receptor accessory protein                                       | -55.5       | 699       | 13     |
| Pnpla3      | patatin-like phospholipase domain containing 3                                  | -53.9       | 1301      | 24     |
| Cox8b       | cytochrome c oxidase, subunit VIIIb                                             | -51.0       | 1324      | 26     |
| Amy1        | amylase 1, salivary                                                             | -45.1       | 1721      | 38     |
| Cyp2e1      | cytochrome P450, family 2, subfamily e, polypeptide 1                           | -44.3       | 5209      | 118    |
| Slc7a10     | solute carrier family 7 (cationic amino acid transporter, y+ system), member 10 | -43.9       | 560       | 13     |
| Pck1        | phosphoenolpyruvate carboxykinase 1, cytosolic                                  | -43.9       | 3071      | 70     |
| Wap         | whey acidic protein                                                             | -43.7       | 7058      | 161    |
| Sycp3       | synaptonemal complex protein 3                                                  | -43.7       | 1954      | 45     |
| Retn        | resistin                                                                        | -35.7       | 10637     | 298    |
| Orm1        | orosomucoid 1                                                                   | -34.5       | 1083      | 31     |
| Rbp4        | retinol binding protein 4, plasma                                               | -33.9       | 3187      | 94     |
| Plin4       | perilipin 4                                                                     | -33.4       | 3181      | 95     |
| Mc2r        | melanocortin 2 receptor                                                         | -32.2       | 575       | 18     |
| Lao1        | L-amino acid oxidase 1                                                          | -30.2       | 3092      | 103    |
| Adhfe1      | alcohol dehydrogenase, iron containing, 1                                       | -29.4       | 797       | 33     |
| Sncg        | synuclein, gamma                                                                | -28.7       | 4718      | 164    |
| Fabp3       | fatty acid binding protein 3, muscle and heart                                  | -27.0       | 886       | 33     |
| Thrsp       | thyroid hormone responsive SPOT14 homolog (Rattus)                              | -24.8       | 7743      | 340    |
| Timp4       | tissue inhibitor of metalloproteinase 4                                         | -24.0       | 646       | 15     |
| Myoz1       | myozenin 1                                                                      | -23.8       | 5834      | 245    |
| Cd36        | CD36 antigen                                                                    | -22.5       | 6726      | 306    |
| Cidea       | cell death-inducing DNA fragmentation factor, alpha subunit-like effector A     | -22.5       | 918       | 42     |
| Car4        | carbonic anhydrase 4                                                            | -22.3       | 982       | 44     |
| Car3        | carbonic anhydrase 3                                                            | -21.9       | 12543     | 1726   |
| Fabp4       | fatty acid binding protein 4, adipocyte                                         | -21.7       | 7777      | 3543   |
| Myh1        | myosin, heavy polypeptide 1, skeletal muscle, adult                             | -21.7       | 857       | 40     |
| Adipoq      | adiponectin, C1Q and collagen domain containing                                 | -21.6       | 10299     | 522    |
| Adig        | adipogenin                                                                      | -20.8       | 1676      | 85     |
| Dmbt1       | deleted in malignant brain tumors 1                                             | -20.2       | 1155      | 57     |
| Lhx8        | LIM homeobox protein 8                                                          | -20.2       | 555       | 26     |
| Acs1        | acyl-CoA synthetase long-chain family member 1                                  | -18.6       | 3172      | 374    |
| Glycam1     | glycosylation dependent cell adhesion molecule 1                                | -18.6       | 2953      | 166    |
| Npr3        | natriuretic peptide receptor 3                                                  | -17.8       | 1362      | 77     |
| Ckmt2       | creatine kinase, mitochondrial 2                                                | -17.6       | 820       | 46     |
| Lalba       | lactalbumin, alpha                                                              | -17.0       | 361       | 21     |
| Csn1s1      | casein alpha s1                                                                 | -16.2       | 14199     | 874    |
| Lipe        | lipase, hormone sensitive                                                       | -16.2       | 1329      | 82     |
| Hsd11b1     | hydroxysteroid 11-beta dehydrogenase 1                                          | -15.7       | 2815      | 179    |
| Pcolce2     | procollagen C-endopeptidase enhancer 2                                          | -15.5       | 510       | 33     |
| Smr2        | submaxillary gland androgen regulated protein 2                                 | -15.2       | 523       | 43     |
| Csn2        | casein beta                                                                     | -15.1       | 11308     | 1378   |
| Gdf10       | growth differentiation factor 10                                                | -15.1       | 400       | 26     |
| Klb         | klotho beta                                                                     | -15.1       | 629       | 42     |
| Ifi2712b    | interferon, alpha-inducible protein 27 like 2B                                  | -14.8       | 683       | 46     |
| Ppp1r1a     | protein phosphatase 1, regulatory (inhibitor) subunit 1A                        | -14.0       | 704       | 50     |
| Pparg       | peroxisome proliferator activated receptor gamma                                | -13.9       | 967       | 69     |
| Atp2a1      | ATPase, Ca++ transporting, cardiac muscle, fast twitch 1                        | -13.7       | 489       | 36     |
| Pcx         | pyruvate carboxylase                                                            | -13.1       | 1588      | 95     |
| Gjb6        | gap junction protein, beta 6                                                    | -12.6       | 565       | 45     |

|          |                                                                           |       |       |      |
|----------|---------------------------------------------------------------------------|-------|-------|------|
| Ckm      | creatine kinase, muscle                                                   | -12.5 | 1380  | 110  |
| Inmt     | indolethylamine N-methyltransferase                                       | -12.5 | 3067  | 245  |
| Pvalb    | parvalbumin                                                               | -12.4 | 636   | 51   |
| Dgat2    | diacylglycerol O-acyltransferase 2                                        | -12.4 | 4000  | 521  |
| Acta1    | actin, alpha 1, skeletal muscle                                           | -12.1 | 3899  | 322  |
| Aldh1a7  | aldehyde dehydrogenase family 1, subfamily A7                             | -12.1 | 1109  | 92   |
| Cel      | carboxyl ester lipase                                                     | -12.1 | 955   | 79   |
| Hoxa5    | homeobox A5                                                               | -11.9 | 336   | 28   |
| Aspa     | aspartoacylase                                                            | -11.6 | 340   | 29   |
| Acacb    | acetyl-Coenzyme A carboxylase beta                                        | -11.5 | 530   | 46   |
| Nnat     | neuronatin                                                                | -11.2 | 2663  | 237  |
| Tnnt3    | troponin T3, skeletal, fast                                               | -11.2 | 778   | 69   |
| Tnnc2    | troponin C2, fast                                                         | -11.2 | 2204  | 197  |
| Myh4     | myosin, heavy polypeptide 4, skeletal muscle                              | -11.2 | 1428  | 128  |
| Fgb      | fibrinogen beta chain                                                     | -11.0 | 3413  | 311  |
| Ifi2712a | interferon, alpha-inducible protein 27 like 2A                            | -10.8 | 8124  | 750  |
| Acaa1b   | acetyl-Coenzyme A acyltransferase 1B                                      | -10.6 | 696   | 66   |
| Myl1     | myosin, light polypeptide 1                                               | -10.4 | 1656  | 166  |
| Aoc3     | amine oxidase, copper containing 3                                        | -10.3 | 3162  | 306  |
| Btn1a1   | butyrophilin, subfamily 1, member A1                                      | -10.3 | 1440  | 140  |
| Ephx2    | epoxide hydrolase 2, cytoplasmic                                          | -10.0 | 1402  | 140  |
| Atp1a2   | ATPase, Na <sup>+</sup> /K <sup>+</sup> transporting, alpha 2 polypeptide | -10.0 | 441   | 25   |
| Ntrk2    | neurotrophic tyrosine kinase, receptor, type 2                            | -9.7  | 709   | 73   |
| Lpl      | lipoprotein lipase                                                        | -9.6  | 6823  | 713  |
| Cfd      | complement factor D (adipsin)                                             | -9.5  | 11467 | 1203 |
| Pgam2    | phosphoglycerate mutase 2                                                 | -8.9  | 628   | 70   |
| Nmu      | neuromedin U                                                              | -8.3  | 1226  | 148  |
| Ebf3     | early B-cell factor 3                                                     | -8.2  | 638   | 78   |
| Cox6a2   | cytochrome c oxidase, subunit VI a, polypeptide 2                         | -8.1  | 405   | 50   |
| Fhl1     | four and a half LIM domains 1                                             | -8.0  | 1435  | 179  |
| Rarres2  | retinoic acid receptor responder (tazarotene induced) 2                   | -8.0  | 3001  | 384  |
| Lgals12  | lectin, galactose binding, soluble 12                                     | -8.0  | 871   | 109  |
| Art3     | ADP-ribosyltransferase 3                                                  | -8.0  | 1692  | 219  |
| Ctsr     | cathepsin R                                                               | -7.9  | 3420  | 431  |
| Ltf      | lactotransferrin                                                          | -7.9  | 2207  | 279  |
| Cpa3     | carboxypeptidase A3, mast cell                                            | -7.7  | 603   | 79   |
| Fasn     | fatty acid synthase                                                       | -7.3  | 11558 | 1579 |
| Hoxa3    | homeobox A3                                                               | -7.3  | 379   | 52   |
| Igh-2    | immunoglobulin heavy chain 2 (serum IgA)                                  | -7.3  | 2201  | 308  |
| Mylpf    | myosin light chain, phosphorylatable, fast skeletal muscle                | -7.3  | 1620  | 223  |
| G0s2     | G0/G1 switch gene 2                                                       | -7.2  | 4310  | 598  |
| Ccl21a   | chemokine (C-C motif) ligand 21A                                          | -7.1  | 307   | 43   |
| Ptger3   | prostaglandin E receptor 3 (subtype EP3)                                  | -7.1  | 1106  | 157  |
| Ghr      | growth hormone receptor                                                   | -6.9  | 3255  | 695  |
| Hnmt     | histamine N-methyltransferase                                             | -6.9  | 409   | 59   |
| Pi16     | peptidase inhibitor 16                                                    | -6.8  | 823   | 121  |
| Igj      | immunoglobulin joining chain                                              | -6.6  | 1353  | 204  |
| Fmo1     | flavin containing monooxygenase 1                                         | -6.5  | 876   | 135  |
| Slc22a3  | solute carrier family 22 (organic cation transporter), member 3           | -6.5  | 566   | 87   |
| Sorbs1   | sorbin and SH3 domain containing 1                                        | -6.5  | 2532  | 581  |
| Tns1     | tensin 1                                                                  | -6.5  | 637   | 97   |
| Enpep    | glutamyl aminopeptidase                                                   | -6.4  | 1253  | 195  |
| Pygl     | liver glycogen phosphorylase                                              | -6.4  | 1600  | 250  |
| Scd1     | stearoyl-Coenzyme A desaturase 1                                          | -6.4  | 7943  | 2026 |
| Lims2    | LIM and senescent cell antigen like domains 2                             | -6.2  | 408   | 65   |
| Mup1     | major urinary protein 1                                                   | -6.2  | 709   | 114  |
| Aldh1l1  | aldehyde dehydrogenase 1 family, member L1                                | -6.0  | 553   | 93   |
| Tnni2    | troponin I, skeletal, fast 2                                              | -5.9  | 1042  | 228  |
| Chpt1    | choline phosphotransferase 1                                              | -5.8  | 1658  | 327  |
| Lrg1     | leucine-rich alpha-2-glycoprotein 1                                       | -5.8  | 1110  | 191  |
| Ccdc80   | coiled-coil domain containing 80                                          | -5.7  | 2600  | 944  |
| Eepd1    | endonuclease/exonuclease/phosphatase family domain containing 1           | -5.6  | 323   | 57   |
| Fzd4     | frizzled homolog 4 (Drosophila)                                           | -5.6  | 413   | 74   |
| Slc1a5   | solute carrier family 1 (neutral amino acid transporter), member 5        | -5.6  | 2664  | 476  |
| Accs2    | acyl-CoA synthetase short-chain family member 2                           | -5.5  | 969   | 160  |

|          |                                                                                               |      |      |      |
|----------|-----------------------------------------------------------------------------------------------|------|------|------|
| Prelp    | proline arginine-rich end leucine-rich repeat                                                 | -5.5 | 1378 | 249  |
| Mgll     | monoglyceride lipase                                                                          | -5.5 | 3443 | 632  |
| Nrg4     | neuregulin 4                                                                                  | -5.4 | 683  | 126  |
| Dpt      | dermatopontin                                                                                 | -5.3 | 3830 | 724  |
| Mettl7a1 | methyltransferase like 7A1                                                                    | -5.2 | 1873 | 352  |
| Sult1a1  | sulfotransferase family 1A, phenol-preferring, member 1                                       | -5.2 | 1688 | 323  |
| Chst1    | carbohydrate (keratan sulfate Gal-6) sulfotransferase 1                                       | -5.1 | 1227 | 240  |
| Igfals   | insulin-like growth factor binding protein, acid labile subunit                               | -5.1 | 306  | 59   |
| Nnmt     | nicotinamide N-methyltransferase                                                              | -5.1 | 872  | 171  |
| Pnpla2   | patatin-like phospholipase domain containing 2                                                | -5.1 | 4552 | 890  |
| Clec3b   | C-type lectin domain family 3, member b                                                       | -5.0 | 1419 | 284  |
| Scg3     | secretogranin III                                                                             | -5.0 | 428  | 85   |
| Calml3   | calmodulin-like 3                                                                             | -4.9 | 458  | 93   |
| Cyp2f2   | cytochrome P450, family 2, subfamily f, polypeptide 2                                         | -4.9 | 550  | 112  |
| Eno3     | enolase 3, beta muscle                                                                        | -4.9 | 672  | 136  |
| Ido1     | indoleamine 2,3-dioxygenase 1                                                                 | -4.8 | 406  | 85   |
| Ldb3     | LIM domain binding 3                                                                          | -4.8 | 426  | 89   |
| Lpin1    | lipin 1                                                                                       | -4.8 | 1167 | 268  |
| Gstz1    | glutathione transferase zeta 1 (maleylacetoacetate isomerase)                                 | -4.7 | 1602 | 342  |
| Sod3     | superoxide dismutase 3, extracellular                                                         | -4.7 | 678  | 145  |
| Cyp4b1   | cytochrome P450, family 4, subfamily b, polypeptide 1                                         | -4.6 | 1286 | 283  |
| Fxyd1    | FXYP domain-containing ion transport regulator 1                                              | -4.6 | 734  | 158  |
| Higd1c   | HIG1 domain family, member 1C                                                                 | -4.6 | 1027 | 232  |
| Slc24a3  | solute carrier family 24 (sodium/potassium/calcium exchanger), member 3                       | -4.6 | 821  | 179  |
| Smoc1    | SPARC related modular calcium binding 1                                                       | -4.5 | 697  | 154  |
| Fam20c   | family with sequence similarity 20, member C                                                  | -4.5 | 803  | 179  |
| Mmd      | monocyte to macrophage differentiation-associated                                             | -4.5 | 4007 | 898  |
| Htra3    | HtrA serine peptidase 3                                                                       | -4.4 | 1619 | 367  |
| Adh1     | alcohol dehydrogenase 1 (class I)                                                             | -4.3 | 835  | 194  |
| Igf1     | insulin-like growth factor 1                                                                  | -4.3 | 558  | 153  |
| Mbp      | myelin basic protein                                                                          | -4.3 | 1266 | 186  |
| Steap4   | STEAP family member 4                                                                         | -4.3 | 2348 | 546  |
| Tmprss2  | transmembrane protease, serine 2                                                              | -4.3 | 1582 | 514  |
| Krt79    | keratin 79                                                                                    | -4.2 | 530  | 127  |
| Mfng     | MFNG O-fucosylpeptide 3-beta-N-acetylglucosaminyltransferase                                  | -4.2 | 451  | 108  |
| Odz4     | odd Oz/ten-m homolog 4 (Drosophila)                                                           | -4.2 | 336  | 81   |
| Ogn      | osteoglycin                                                                                   | -4.2 | 960  | 339  |
| Sgce     | sarcoglycan, epsilon                                                                          | -4.2 | 516  | 122  |
| Aacs     | acetoacetyl-CoA synthetase                                                                    | -4.1 | 1176 | 320  |
| Acox1    | acyl-Coenzyme A oxidase 1, palmitoyl                                                          | -4.1 | 920  | 225  |
| Cmb1     | carboxymethylenebutenolidase-like (Pseudomonas)                                               | -4.1 | 1116 | 275  |
| Gjb2     | gap junction protein, beta 2                                                                  | -4.1 | 1572 | 384  |
| Cldn15   | claudin 15                                                                                    | -4.0 | 513  | 129  |
| Ndrp1    | N-myc downstream regulated gene 1                                                             | -4.0 | 518  | 144  |
| Ppp1r3c  | protein phosphatase 1, regulatory (inhibitor) subunit 3C                                      | -4.0 | 864  | 214  |
| Pxmp2    | peroxisomal membrane protein 2                                                                | -4.0 | 597  | 148  |
| Tcap     | titin-cap                                                                                     | -4.0 | 324  | 80   |
| Tmem120b | transmembrane protein 120B                                                                    | -4.0 | 492  | 123  |
| Depdc6   | DEP domain containing 6                                                                       | -3.9 | 589  | 149  |
| Pdlim3   | PDZ and LIM domain 3                                                                          | -3.9 | 1138 | 294  |
| Prnp     | prion protein                                                                                 | -3.9 | 1258 | 319  |
| Smoc2    | SPARC related modular calcium binding 2                                                       | -3.9 | 1025 | 263  |
| Xdh      | xanthine dehydrogenase                                                                        | -3.9 | 1400 | 362  |
| Abi3bp   | ABI gene family, member 3 (NESH) binding protein                                              | -3.8 | 351  | 92   |
| Dbp      | D site albumin promoter binding protein                                                       | -3.8 | 1275 | 371  |
| Ifi203   | interferon activated gene 203                                                                 | -3.8 | 434  | 114  |
| Aldh6a1  | aldehyde dehydrogenase family 6, subfamily A1                                                 | -3.7 | 2191 | 585  |
| C3       | complement component 3                                                                        | -3.7 | 4416 | 1208 |
| Hp       | haptoglobin                                                                                   | -3.7 | 4266 | 1141 |
| Palmd    | palmdelphin                                                                                   | -3.7 | 681  | 182  |
| Rbpms    | RNA binding protein gene with multiple splicing                                               | -3.7 | 467  | 125  |
| Smr3a    | submaxillary gland androgen regulated protein 3A                                              | -3.7 | 980  | 264  |
| Adamts5  | a disintegrin-like and metallopeptidase (reprolysin type) with thrombospondin type 1 motif, 5 | -3.6 | 649  | 179  |
| Ebf1     | early B-cell factor 1                                                                         | -3.6 | 780  | 219  |
| Gpd1     | glycerol-3-phosphate dehydrogenase 1 (soluble)                                                | -3.6 | 1710 | 283  |

|          |                                                                                        |      |      |      |
|----------|----------------------------------------------------------------------------------------|------|------|------|
| Gpt      | glutamic pyruvic transaminase, soluble                                                 | -3.6 | 577  | 159  |
| Gpt2     | glutamic pyruvate transaminase (alanine aminotransferase) 2                            | -3.6 | 1338 | 438  |
| Klf15    | Kruppel-like factor 15                                                                 | -3.6 | 532  | 149  |
| Txnip    | thioredoxin interacting protein                                                        | -3.6 | 2044 | 570  |
| Abca8a   | ATP-binding cassette, sub-family A (ABC1), member 8a                                   | -3.5 | 1675 | 478  |
| Fgf13    | fibroblast growth factor 13                                                            | -3.5 | 471  | 136  |
| Gnai1    | guanine nucleotide binding protein (G protein), alpha inhibiting 1                     | -3.5 | 2034 | 738  |
| Ifi205   | interferon activated gene 205                                                          | -3.5 | 1089 | 311  |
| Net1     | neuroepithelial cell transforming gene 1                                               | -3.5 | 647  | 185  |
| Sfrp2    | secreted frizzled-related protein 2                                                    | -3.5 | 618  | 174  |
| Aqp1     | aquaporin 1                                                                            | -3.4 | 2841 | 848  |
| Cxcr7    | chemokine (C-X-C motif) receptor 7                                                     | -3.4 | 1152 | 337  |
| Dpep1    | dipeptidase 1 (renal)                                                                  | -3.4 | 768  | 229  |
| Gstt1    | glutathione S-transferase, theta 1                                                     | -3.4 | 1040 | 308  |
| Ly6d     | lymphocyte antigen 6 complex, locus D                                                  | -3.4 | 4415 | 1301 |
| Me1      | malic enzyme 1, NADP(+)-dependent, cytosolic                                           | -3.4 | 2810 | 900  |
| Gata2    | GATA binding protein 2                                                                 | -3.3 | 492  | 151  |
| Igfbp6   | insulin-like growth factor binding protein 6                                           | -3.3 | 1466 | 450  |
| Mb       | myoglobin                                                                              | -3.3 | 747  | 230  |
| Prkch    | protein kinase C, eta                                                                  | -3.3 | 332  | 101  |
| Rbpms2   | RNA binding protein with multiple splicing 2                                           | -3.3 | 791  | 237  |
| Retsat   | retinol saturase (all trans retinol 13,14 reductase)                                   | -3.3 | 488  | 146  |
| Spp1     | secreted phosphoprotein 1                                                              | -3.3 | 5518 | 1673 |
| Thbd     | thrombomodulin                                                                         | -3.3 | 559  | 170  |
| Timp3    | tissue inhibitor of metalloproteinase 3                                                | -3.3 | 1895 | 613  |
| Bglap    | bone gamma carboxyglutamate protein                                                    | -3.2 | 489  | 154  |
| Cd1d1    | CD1d1 antigen                                                                          | -3.2 | 1837 | 638  |
| Dram1    | DNA-damage regulated autophagy modulator 1                                             | -3.2 | 1239 | 393  |
| Efemp1   | epidermal growth factor-containing fibulin-like extracellular matrix protein 1         | -3.2 | 1758 | 543  |
| Fads3    | fatty acid desaturase 3                                                                | -3.2 | 1545 | 485  |
| Fndc1    | fibronectin type III domain containing 1                                               | -3.2 | 681  | 214  |
| Hoxc8    | homeobox C8                                                                            | -3.2 | 386  | 120  |
| Lipa     | lysosomal acid lipase A                                                                | -3.2 | 374  | 117  |
| Nid1     | nidogen 1                                                                              | -3.2 | 543  | 172  |
| Slc25a10 | solute carrier family 25 (mitochondrial carrier, dicarboxylate transporter), member 10 | -3.2 | 336  | 104  |
| Slc27a1  | solute carrier family 27 (fatty acid transporter), member 1                            | -3.2 | 522  | 163  |
| Alox12e  | arachidonate lipoxygenase, epidermal                                                   | -3.1 | 818  | 262  |
| Cldn5    | claudin 5                                                                              | -3.1 | 1127 | 362  |
| Elovl6   | ELOVL family member 6, elongation of long chain fatty acids (yeast)                    | -3.1 | 1088 | 320  |
| Fap      | fibroblast activation protein                                                          | -3.1 | 857  | 280  |
| Spnb2    | spectrin beta 2                                                                        | -3.1 | 440  | 142  |
| St3gal6  | ST3 beta-galactoside alpha-2,3-sialyltransferase 6                                     | -3.1 | 302  | 99   |
| Ang3     | angiogenin, ribonuclease A family, member 3                                            | -3.0 | 2978 | 1004 |
| Gpam     | glycerol-3-phosphate acyltransferase, mitochondrial                                    | -3.0 | 2818 | 947  |
| Hoxd8    | homeobox D8                                                                            | -3.0 | 487  | 162  |
| Ndrp2    | N-myc downstream regulated gene 2                                                      | -3.0 | 944  | 314  |
| Nr1h3    | nuclear receptor subfamily 1, group H, member 3                                        | -3.0 | 1137 | 379  |
| Selenbp1 | selenium binding protein 1                                                             | -3.0 | 1699 | 559  |
| Slc1a3   | solute carrier family 1 (glial high affinity glutamate transporter), member 3          | -3.0 | 638  | 175  |
| Acly     | ATP citrate lyase                                                                      | -2.9 | 993  | 343  |
| Aplp2    | amyloid beta (A4) precursor-like protein 2                                             | -2.9 | 1405 | 481  |
| Cdkn1c   | cyclin-dependent kinase inhibitor 1C (P57)                                             | -2.9 | 756  | 263  |
| Galnt2   | UDP-N-acetyl-alpha-D-galactosamine:polypeptide N-acetylgalactosaminyltransferase 2     | -2.9 | 345  | 118  |
| Pik3r1   | phosphatidylinositol 3-kinase, regulatory subunit, polypeptide 1 (p85 alpha)           | -2.9 | 558  | 192  |
| Ptprb    | protein tyrosine phosphatase, receptor type, B                                         | -2.9 | 369  | 125  |
| Rbp7     | retinol binding protein 7, cellular                                                    | -2.9 | 1212 | 418  |
| Rasgrp2  | RAS, guanyl releasing protein 2                                                        | -2.8 | 502  | 178  |
| Ak3      | adenylate kinase 3                                                                     | -2.8 | 681  | 243  |
| C1ra     | complement component 1, r subcomponent A                                               | -2.8 | 1063 | 384  |
| Crat     | carnitine acetyltransferase                                                            | -2.8 | 537  | 191  |
| Fst      | follicle-stimulating hormone receptor                                                  | -2.8 | 688  | 246  |
| Hspb8    | heat shock protein 8                                                                   | -2.8 | 564  | 203  |
| Ms4a4d   | membrane-spanning 4-domains, subfamily A, member 4D                                    | -2.8 | 390  | 142  |
| Pam      | peptidylglycine alpha-amidating monooxygenase                                          | -2.8 | 1019 | 363  |
| Papss2   | 3'-phosphoadenosine 5'-phosphosulfate synthase 2                                       | -2.8 | 445  | 161  |

|           |                                                                        |      |      |      |
|-----------|------------------------------------------------------------------------|------|------|------|
| Slc2a4    | solute carrier family 2 (facilitated glucose transporter), member 4    | -2.8 | 1021 | 364  |
| Sord      | sorbitol dehydrogenase                                                 | -2.8 | 700  | 250  |
| Akr1c14   | aldo-keto reductase family 1, member C14                               | -2.7 | 433  | 158  |
| Atrx      | alpha thalassemia/mental retardation syndrome X-linked homolog (human) | -2.7 | 389  | 146  |
| Car2      | carbonic anhydrase 2                                                   | -2.7 | 1269 | 464  |
| Col13a1   | collagen, type XIII, alpha 1                                           | -2.7 | 465  | 172  |
| Ehd2      | EH-domain containing 2                                                 | -2.7 | 1388 | 507  |
| Ehhadh    | enoyl-Coenzyme A, hydratase/3-hydroxyacyl Coenzyme A dehydrogenase     | -2.7 | 341  | 126  |
| Entpd2    | ectonucleoside triphosphate diphosphohydrolase 2                       | -2.7 | 559  | 205  |
| Gbe1      | glucan (1,4-alpha-), branching enzyme 1                                | -2.7 | 723  | 267  |
| Hk2       | hexokinase 2                                                           | -2.7 | 1447 | 534  |
| Kcnk5     | potassium channel, subfamily K, member 5                               | -2.7 | 398  | 147  |
| Lbp       | lipopolysaccharide binding protein                                     | -2.7 | 1028 | 377  |
| Lpgat1    | lysophosphatidylglycerol acyltransferase 1                             | -2.7 | 399  | 150  |
| Nos3      | nitric oxide synthase 3, endothelial cell                              | -2.7 | 419  | 158  |
| Pecam1    | platelet/endothelial cell adhesion molecule 1                          | -2.7 | 582  | 213  |
| Pmp22     | peripheral myelin protein 22                                           | -2.7 | 3041 | 1133 |
| Serping1  | serine (or cysteine) peptidase inhibitor, clade G, member 1            | -2.7 | 3517 | 1320 |
| Alas2     | aminolevulinic acid synthase 2, erythroid                              | -2.6 | 471  | 180  |
| Apod      | apolipoprotein D                                                       | -2.6 | 4011 | 1526 |
| Atp6v1c2  | ATPase, H+ transporting, lysosomal V1 subunit C2                       | -2.6 | 1170 | 451  |
| C4b       | complement component 4B (Childo blood group)                           | -2.6 | 1144 | 445  |
| Clca2     | chloride channel calcium activated 2                                   | -2.6 | 1831 | 713  |
| Gatm      | glycine amidinotransferase (L-arginine:glycine amidinotransferase)     | -2.6 | 400  | 152  |
| Ltc4s     | leukotriene C4 synthase                                                | -2.6 | 467  | 179  |
| Mxra8     | matrix-remodelling associated 8                                        | -2.6 | 1386 | 535  |
| Pfkfb1    | 6-phosphofructo-2-kinase/fructose-2,6-biphosphatase 1                  | -2.6 | 320  | 124  |
| Slc12a2   | solute carrier family 12, member 2                                     | -2.6 | 1279 | 490  |
| Slc39a8   | solute carrier family 39 (metal ion transporter), member 8             | -2.6 | 578  | 222  |
| Snta1     | syntrophin, acidic 1                                                   | -2.6 | 370  | 141  |
| Car6      | carbonic anhydrase 6                                                   | -2.6 | 400  | 156  |
| Ckb       | creatine kinase, brain                                                 | -2.6 | 1135 | 445  |
| Alpl      | alkaline phosphatase, liver/bone/kidney                                | -2.5 | 388  | 154  |
| Aspn      | asporin                                                                | -2.5 | 357  | 142  |
| Cebpa     | CCAAT/enhancer binding protein (C/EBP), alpha                          | -2.5 | 1819 | 734  |
| Clca1     | chloride channel calcium activated 1                                   | -2.5 | 1773 | 698  |
| Dcn       | decorin                                                                | -2.5 | 9261 | 3670 |
| Dgat1     | diacylglycerol O-acyltransferase 1                                     | -2.5 | 1065 | 425  |
| Folr1     | folate receptor 1 (adult)                                              | -2.5 | 711  | 285  |
| Gstm1     | glutathione S-transferase, mu 1                                        | -2.5 | 1918 | 753  |
| H19       | H19 fetal liver mRNA                                                   | -2.5 | 566  | 223  |
| Idh1      | isocitrate dehydrogenase 1 (NADP+), soluble                            | -2.5 | 1532 | 616  |
| Mknk2     | MAP kinase-interacting serine/threonine kinase 2                       | -2.5 | 437  | 176  |
| Opn3      | opsin 3                                                                | -2.5 | 395  | 160  |
| Plin2     | perilipin 2                                                            | -2.5 | 6773 | 2671 |
| Ptgs1     | prostaglandin-endoperoxide synthase 1                                  | -2.5 | 362  | 145  |
| Ptrf      | polymerase I and transcript release factor                             | -2.5 | 2562 | 1027 |
| Serpina3n | serine (or cysteine) peptidase inhibitor, clade A, member 3N           | -2.5 | 797  | 324  |
| Vegfb     | vascular endothelial growth factor B                                   | -2.5 | 438  | 176  |
| Gsn       | gelsolin                                                               | -2.5 | 9034 | 3380 |
| Slc6a15   | solute carrier family 6 (neurotransmitter transporter), member 15      | 2.5  | 289  | 709  |
| Arl4d     | ADP-ribosylation factor-like 4D                                        | 2.5  | 323  | 797  |
| Tcfap2b   | transcription factor AP-2 beta                                         | 2.5  | 248  | 614  |
| Serinc1   | serine incorporator 1                                                  | 2.5  | 125  | 315  |
| Ereg      | epiregulin                                                             | 2.5  | 125  | 315  |
| Rps25     | ribosomal protein S25                                                  | 2.5  | 459  | 1159 |
| Brwd1     | bromodomain and WD repeat domain containing 1                          | 2.5  | 165  | 417  |
| Aard      | alanine and arginine rich domain containing protein                    | 2.6  | 187  | 480  |
| Luc7l2    | LUC7-like 2 (S. cerevisiae)                                            | 2.6  | 143  | 453  |
| Meg3      | maternally expressed 3                                                 | 2.6  | 277  | 722  |
| Mapk8     | mitogen-activated protein kinase 8                                     | 2.6  | 187  | 490  |
| Pabpn1    | poly(A) binding protein, nuclear 1                                     | 2.6  | 480  | 1266 |
| Cwc22     | CWC22 spliceosome-associated protein homolog (S. cerevisiae)           | 2.7  | 460  | 1244 |
| Eppk1     | epiplakin 1                                                            | 2.7  | 567  | 1530 |
| Rbmx      | RNA binding motif protein, X chromosome                                | 2.7  | 220  | 596  |

|          |                                                                 |      |      |      |
|----------|-----------------------------------------------------------------|------|------|------|
| Rpl41    | ribosomal protein L41                                           | 2.7  | 1250 | 3419 |
| Zbtb16   | zinc finger and BTB domain containing 16                        | 2.8  | 550  | 1536 |
| Esrrb    | estrogen related receptor, beta                                 | 2.8  | 179  | 505  |
| Snhg1    | small nucleolar RNA host gene (non-protein coding) 1            | 2.9  | 132  | 380  |
| Vps41    | vacuolar protein sorting 41 (yeast)                             | 2.9  | 111  | 320  |
| Zfp207   | zinc finger protein 207                                         | 2.9  | 168  | 490  |
| Tardbp   | TAR DNA binding protein                                         | 3.0  | 257  | 759  |
| Nisch    | nischarin                                                       | 3.0  | 151  | 487  |
| Rps24    | ribosomal protein S24                                           | 3.0  | 184  | 559  |
| Tesc     | tescalcin                                                       | 3.1  | 122  | 372  |
| Ints6    | integrator complex subunit 6                                    | 3.1  | 485  | 1490 |
| Pabpc1   | poly(A) binding protein, cytoplasmic 1                          | 3.1  | 130  | 406  |
| Bex1     | brain expressed gene 1                                          | 3.2  | 1306 | 4129 |
| Gas5     | growth arrest specific 5                                        | 3.2  | 276  | 888  |
| Cdc7     | cell division cycle 7 ( <i>S. cerevisiae</i> )                  | 3.2  | 300  | 971  |
| Pthlh    | parathyroid hormone-like peptide                                | 3.5  | 161  | 556  |
| Rhox5    | reproductive homeobox 5                                         | 3.5  | 156  | 546  |
| Thrap3   | thyroid hormone receptor associated protein 3                   | 3.5  | 130  | 458  |
| Nptx1    | neuronal pentraxin 1                                            | 3.6  | 325  | 1183 |
| Crabp1   | cellular retinoic acid binding protein I                        | 3.8  | 858  | 3278 |
| Calca    | calcitonin/calcitonin-related polypeptide, alpha                | 4.0  | 437  | 1747 |
| Wdr26    | WD repeat domain 26                                             | 4.2  | 108  | 452  |
| Il33     | interleukin 33                                                  | 4.2  | 1112 | 4699 |
| Slc5a8   | solute carrier family 5 (iodide transporter), member 8          | 4.3  | 358  | 1553 |
| Lpp      | LIM domain containing preferred translocation partner in lipoma | 4.4  | 88   | 385  |
| Nfib     | nuclear factor I/B                                              | 4.4  | 148  | 649  |
| Tug1     | Taurine upregulated gene 1                                      | 4.4  | 120  | 527  |
| Bex2     | brain expressed X-linked 2                                      | 4.4  | 114  | 503  |
| Psmd7    | proteasome (prosome, macropain) 26S subunit, non-ATPase, 7      | 4.5  | 77   | 349  |
| Pcp4     | Purkinje cell protein 4                                         | 4.5  | 1503 | 6826 |
| Wfdc12   | WAP four-disulfide core domain 12                               | 4.7  | 636  | 2961 |
| Bex4     | brain expressed gene 4                                          | 4.8  | 260  | 1241 |
| Phip     | pleckstrin homology domain interacting protein                  | 4.8  | 65   | 312  |
| Hnrnpa1  | heterogeneous nuclear ribonucleoprotein A1                      | 5.4  | 187  | 1013 |
| Rbm39    | RNA binding motif protein 39                                    | 6.6  | 96   | 596  |
| Mt1      | metallothionein 1                                               | 6.8  | 300  | 2043 |
| D2Ert93e | DNA segment, Chr 2, ERATO Doi 93, expressed                     | 7.0  | 131  | 919  |
| Rasgrf1  | RAS protein-specific guanine nucleotide-releasing factor 1      | 11.1 | 146  | 1253 |



**Table S3. Primers used for qRT-PCR analysis**

| <b>Gene</b>   | <b>Forward Primer (5'→3')</b> | <b>Reverse Primer (5'→3')</b> |
|---------------|-------------------------------|-------------------------------|
| PPAR $\gamma$ | CAGACAAGATTTGAAAGAAG          | CAGAATGGCATCTCTGTGTC          |
| Esr1          | AACCGCCCATGATCTATTCTG         | AGATTCAAGTCCCCAAAGCC          |
| Pgr           | TGAGCCTGATGGTGTGG             | ACAGCGAGTAGAATGACAGC          |
| Fabp4         | GCCTTTCTCACCTGGAAGAC          | CCCACTCCCCTTCTTTCAT           |
| Fasn          | GGTTCTAGCCAGCAGAGTC           | TCAGCCACTTGAGTGTCCTC          |
| Lep           | GACATTCACACACGCAGTC           | GTGAAGCCCAGGAATGAAGT          |
